# Supplementary material for: Sulfate assimilation regulates hydrogen sulfide production independent of lifespan and reactive oxygen species under methionine restriction condition in yeast
Source: Aging (Albany NY). 2019 Jun 29;11(12):4254–73. doi: 10.18632/aging.102050 (PMC6628990; doi:10.18632/aging.102050)
Supplement: Supplementary Figures [file aging-11-102050-s002.pdf]

## SUPPLEMENTARY MATERIAL

### Supplementary Figures

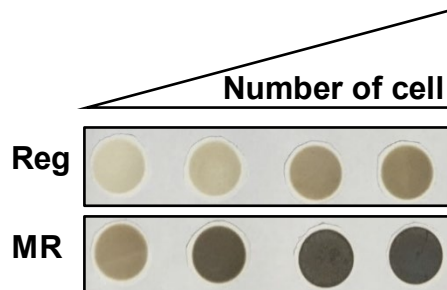

**Figure S1. Hydrogen sulfide production by increasing the number of cells under regular (Reg) and MR condition.** Hydrogen sulfide was detected by lead acetate method.

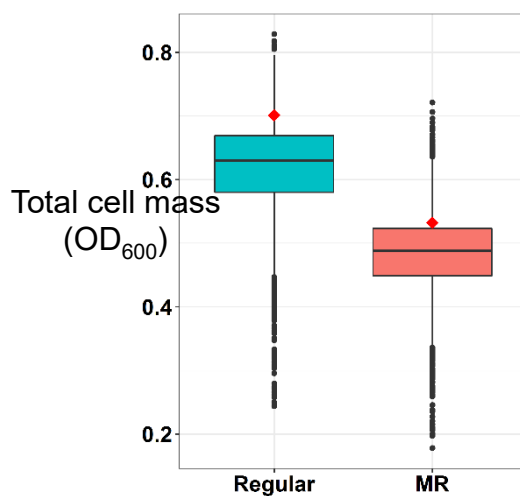

**Figure S2. OD<sub>600</sub> of total screening genes under regular and MR condition at 15 hours after inoculation.** The red diamond indicates value for wild-type.

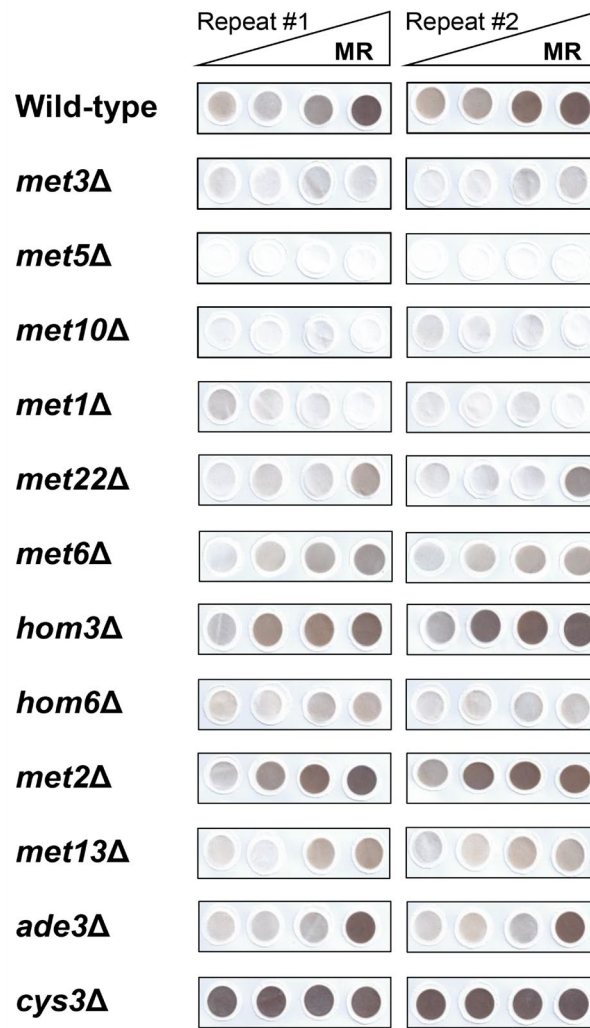

Figure S3. Original images for lead acetate assay in Fig.

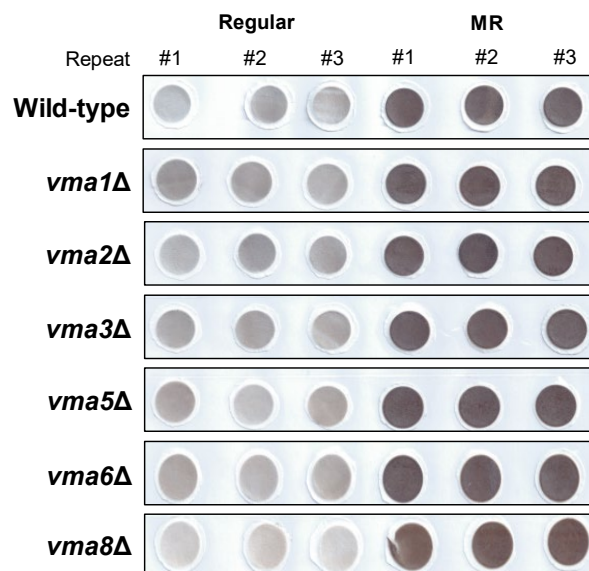

Figure S4. Lead acetate assay for mutants related with vacuolar acidification.

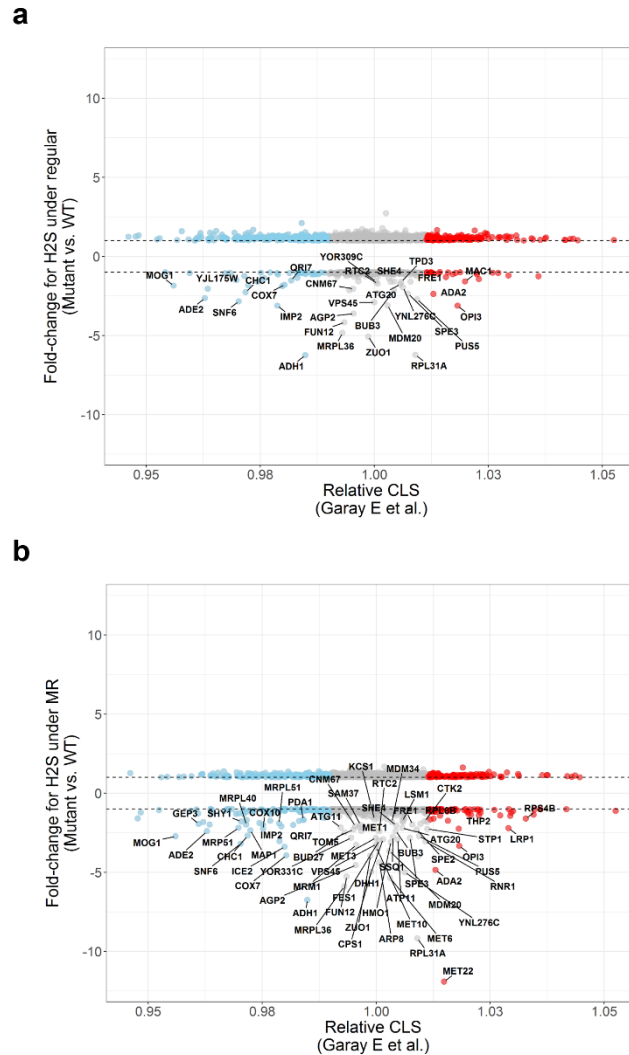

**Figure S5. Comparison between our hydrogen sulfide screening data and chronological lifespan (CLS) screening data by Garay E et al.** Compared to wild-type, change of hydrogen sulfide amount in deletion mutants under regular (a) and MR (b) is depicted. Black dotted line indicates a point where absolute value of fold-change (y axis) is “1”. Black label indicates selected genes by comparison between wild-type and mutant under each condition in this study (fold-change < -1.5 and FDR-adj  $p < 0.05$ ). According to relative CLS, strains with significantly decreased or increased lifespan are shown in blue or red, respectively.

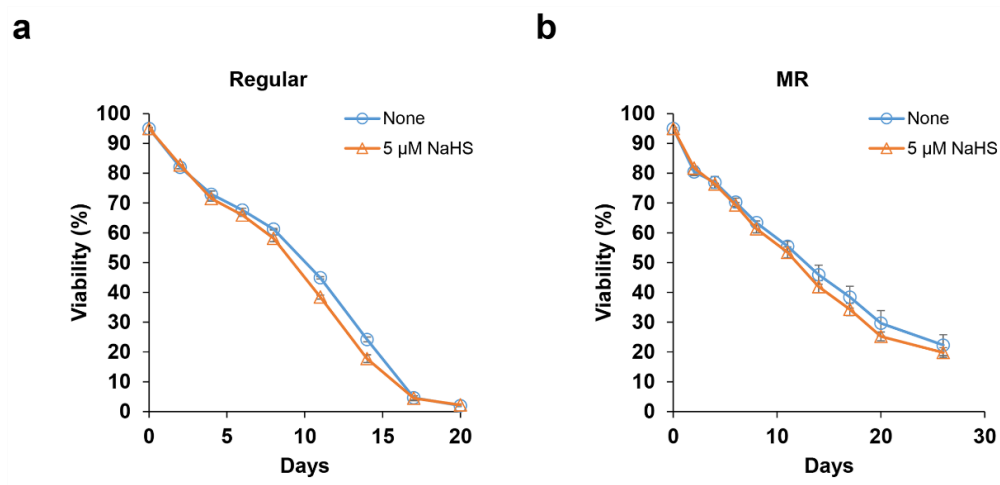

**Figure S6.** Lifespan under regular (a) and MR (b) before (blue line) and after (orange line) treating 5  $\mu$ M NaHS. Graph indicates mean  $\pm$  SEM.

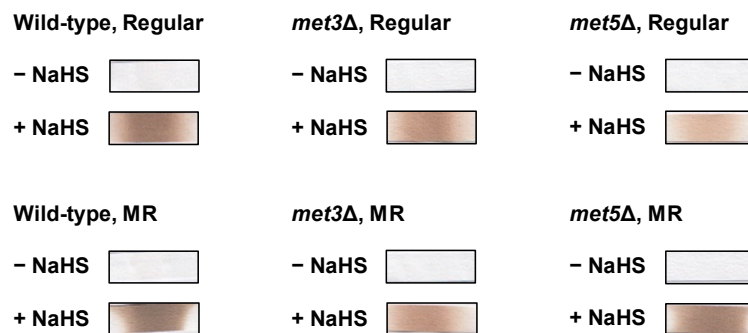

**Figure S7.** Original images for lead acetate assay in Fig. 4.

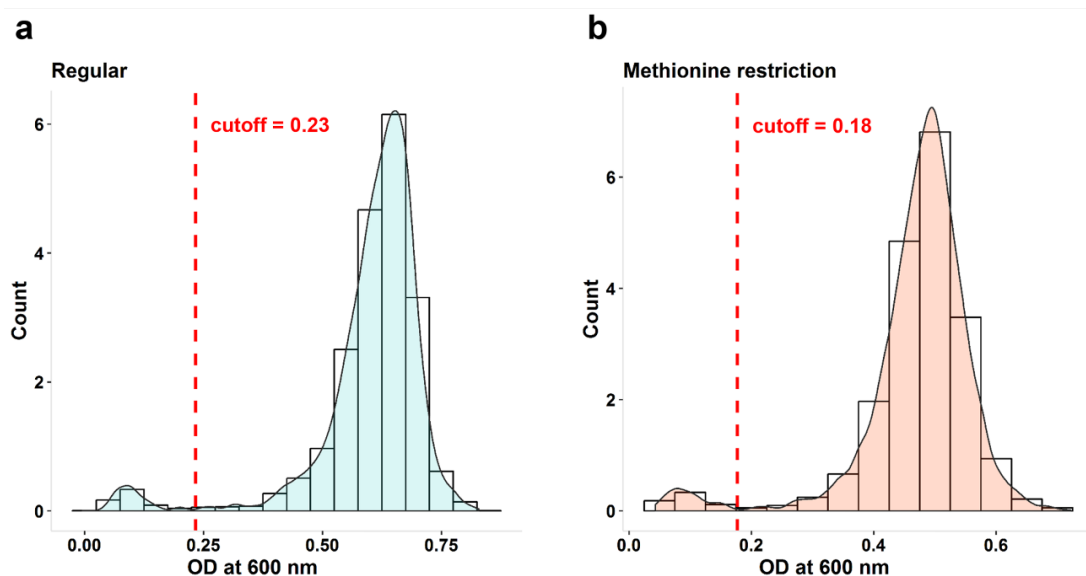

**Figure S8.** Histogram for OD<sub>600</sub> of total screening yeast strains under regular (a) and MR (b). Cells with OD value under a third of wild-type in each condition (below red dotted line) are regarded as the growth-defective.
